# Supplementary material for: Glycosylation of immunoglobulin G is regulated by a large network of genes pleiotropic with inflammatory diseases
Source: PubMed Central journal article supplement (PMC7030929; doi:10.1126/sciadv.aax0301), 2020-02-19
Supplement: aax0301_SM.pdf [file aax0301_SM.pdf]

## Supplementary Materials for

### **Glycosylation of immunoglobulin G is regulated by a large network of genes pleiotropic with inflammatory diseases**

Lucija Klarić\*, Yakov A. Tsepilov, Chloe M. Stanton, Massimo Mangino, Timo Tõnis Sikka, Tõnu Esko, Eugene Pakhomov, Perttu Salo, Joris Deelen, Stuart J. McGurnaghan, Toma Keser, Frano Vučković, Ivo Ugrina, Jasminka Krištić, Ivan Gudelj, Jerko Štambuk, Rosina Plomp, Maja Pučić-Baković, Tamara Pavić, Marija Vilaj, Irena Trbojević-Akmačić, Camilla Drake, Paula Dobrinić, Jelena Mlinarec, Barbara Jelušić, Anne Richmond, Maria Timofeeva, Alexander K. Grishchenko, Julia Dmitrieva, Mairead L. Bermingham, Sodbo Zh. Sharapov, Susan M. Farrington, Evropi Theodoratou, Hae-Won Uh, Marian Beekman, Eline P. Slagboom, Edouard Louis, Michel Georges, Manfred Wuhler, Helen M. Colhoun, Malcolm G. Dunlop, Markus Perola, Krista Fischer, Ozren Polasek, Harry Campbell, Igor Rudan, James F. Wilson, Vlatka Zoldoš, Veronique Vitart, Tim Spector, Yurii S. Aulchenko, Gordan Lauc, Caroline Hayward

\*Corresponding author. Email: [klaric@genos.hr](mailto:klaric@genos.hr)

Published 19 February 2020, *Sci. Adv.* **6**, eaax0301 (2020)

DOI: 10.1126/sciadv.aax0301

#### **The PDF file includes:**

Supplementary Note

Appendix Table 1. Participating studies.

Appendix Table 2. Genotyping overview.

Appendix Table 3. Overview of imputation software and reference panels.

Appendix Table 4. Description of structures for UPLC IgG glycans.

Appendix Table 5. Details of genome-wide association analyses.

Appendix Table 6. Individual GWAS file-level quality control.

Appendix Table 7. Description of structures for LCMS glycans.

Appendix Table 8. Summary-level statistics downloaded for SMR or HEIDI test.

Appendix Table 9. DEPICT gene prioritization.

Appendix Table 10. SNPs associated with IgG glycosylation with nonsynonymous amino acid change.

Appendix Table 11. Strongest eQTL for each probe in each cell type in the CEDAR dataset.

Appendix Figure 1. Phenotypic correlation of UPLC IgG N-glycans.

Fig. S1. Glycome-wide effect estimates of genome-wide significant loci.

Fig. S2A. RUNX3 binding in the proximity of MGAT3 rs8137426, SNP strongly associated with IgG N-glycosylation is the region bound by RUNX3, in the proximity of MGAT3.

Fig. S2B. Top SNPs in *FUT8* locus lie in the same chromosomal topological associating domain as the transcription start site of *FUT8*.

References (46–83)

**Other Supplementary Material for this manuscript includes the following:**

(available at [advances.sciencemag.org/cgi/content/full/6/8/eaax0301/DC1](https://advances.sciencemag.org/cgi/content/full/6/8/eaax0301/DC1))

Table S1 (Microsoft Excel format). Comparison of  $P$  values from current meta-analysis ( $P$ -new) and Lauc *et al.* ( $P$ -old), Shen *et al.* ( $P$ -multivariate), and Wahl *et al.* ( $P$ -LCMS).

Table S2 (Microsoft Excel format). Results of replication and validation analysis.

Table S3 (Microsoft Excel format). Phenotypic variance explained by significantly associated SNPs ( $P \leq 2.4 \times 10^{-9}$ ).

Table S4 (Microsoft Excel format). FUMA GO gene set enrichment analysis.

Table S5 (Microsoft Excel format). DEPICT analysis of gene set enrichment.

Table S6 (Microsoft Excel format). Correlation of glycome-wide effects of top genome-wide significant SNPs associated with IgG glycosylation.

Table S7 (Microsoft Excel format). STRING PPI analysis of genes prioritized in loci associated with IgG N-glycosylation.

Table S8 (Microsoft Excel format). TF motif alterations by glycosylation-associated SNPs.

Table S9 (Microsoft Excel format). Effect of IgG glycosylation-associated SNPs on TF motif-binding disruption compared with nonassociated SNPs from the region.

Table S10 (Microsoft Excel format). Degree of fucosylation of IgG secreted from MATAT6 cells.

## Supplementary Note

### Methods

Descriptions of the glycan data can be found in Huffman *et al*(46).

### Isolation of IgG and glycan analysis

Isolation of IgG and glycan analysis has been described in a greater detail in the following studies: CROATIA-Korcula and CROATIA-Vis(36), ORCADES(47), TWINSUK(48), COGS, EGCUT, FINRISK(49). Details of the liquid chromatography electrospray mass spectrometry used to quantify Fc bound IgG glycopeptides can be found in Plomp *et al*(46).

**IgG isolation.** IgG was isolated from blood plasma samples (70-80 uL) by affinity chromatography binding to CIM® Protein G 96-well plate (BIA Separations, Ajdovščina, Slovenia), using vacuum manifold (Millipore Corporation, Billerica, MA, USA). All steps during the isolation procedure were performed at around 380 mm Hg, except plasma sample application and IgG elution steps (around 200 mm Hg). Protein G plate was washed with 2 mL ultra-pure water (18 MΩ cm at 25 °C), 2 mL 1x PBS pH 7.4, 1 mL 0.1 mol L<sup>-1</sup> formic acid; 2 mL 10x PBS; and equilibrated with 4 mL 1x PBS pH 7.4.

Plasma samples,  $\psi(\text{sample, 1x PBS pH 7.4}) = 1:7$ , were applied to the protein G plate.

Unbound proteins were washed away with 3x 2 mL 1x PBS pH 7.4. Bound IgG was eluted with 1 mL 0.1 mol L<sup>-1</sup> formic acid and neutralized with 1 mol L<sup>-1</sup> ammonium hydrogencarbonate to pH 7.0.

Protein G plate was then washed with 1 mL 0.1 mol L<sup>-1</sup> formic acid, 2 mL 10x PBS, 4 mL 1x PBS pH 7.4, 2 mL storage buffer (ethanol  $\varphi = 20\%$ , 20 mmol L<sup>-1</sup> Tris, 0.1 mol L<sup>-1</sup> NaCl, titrated with HCl to pH 7.4), and plate stored at 4 °C.

**N-glycan release and labelling.** The whole procedure was done in a 96-well plate manner and ultra-pure water was used throughout. Dried IgG samples (150-200 ug) were denatured with the addition of 30  $\mu$ L SDS ( $\gamma = 13.3 \text{ g L}^{-1}$ ) and by incubation at 65 °C for 10 min. After cooling down to room temperature for 30 min, 10  $\mu$ L of Igepal-CA630 ( $\phi = 4 \%$ ) was added and mixture was shaken for 15 min on a plate shaker. N-glycans were released with the addition of 1.2 U of PNGase F (Promega, Madison, WI, USA) in 10  $\mu$ L 5x PBS and incubation at 37 °C for 18 hours. Released N-glycans were labeled with 2-AB. The labeling mixture was freshly prepared by dissolving 2-AB (final  $\gamma = 19.2 \text{ mg mL}^{-1}$ ) and 2-PB (final  $\gamma = 44.8 \text{ mg mL}^{-1}$ ) in the mixture of DMSO and glacial acetic acid,  $\psi(\text{DMSO}, \text{CH}_3\text{COOH}) = 7:3$ . To each N-glycan sample in the 96-well plate 25  $\mu$ L of labeling mixture was added and the plate was sealed using adhesive seal. Mixing was achieved by shaking for 10 min, followed by 2 hour incubation at 65 °C.

**Clean-up of 2-AB labeled glycans.** Free fluorescent label, excess of reagents and proteins were removed from the samples using hydrophilic interaction liquid chromatography solid phase extraction (HILIC-SPE). After cooling down to room temperature for 30 min, 700  $\mu$ L of acetonitrile (previously cooled down to 4 °C) was added to each sample (total volume of 775  $\mu$ L). Clean-up procedure was performed on hydrophilic 0.2  $\mu$ m AcroPrep GHP filter plate. Solvent was removed by application of vacuum using a vacuum manifold at around 25 mm Hg. All wells were prewashed with 200  $\mu$ L ethanol in water ( $\phi = 70 \%$ ), 200  $\mu$ L ultra-pure water and 200  $\mu$ L acetonitrile in water ( $\phi = 96 \%$ , previously cooled down to 4 °C). The samples were loaded to the wells, and after short incubation subsequently washed 5x 200  $\mu$ L acetonitrile in water ( $\phi = 96 \%$ , previously cooled down to 4 °C). Glycans were eluted with 2x 90  $\mu$ L of ultra-pure water after 15 min shaking at room temperature and combined eluates were stored at -20 °C until ultra performance liquid chromatography (UPLC) analysis.

**Glycan analysis by ultra performance liquid chromatography.** Fluorescently labeled N-glycans were separated by HILIC on an Acquity UPLC instrument (Waters, Milford, MA, USA) consisting of a quaternary solvent manager, sample manager and a FLR fluorescence detector set with excitation and emission wavelengths of 250 and 428 nm, respectively. The instrument was under the control of Empower 3 software, build 3471 (Waters). Labeled N-glycans were separated on a Waters BEH Glycan chromatography column, 100 × 2.1 mm i.d., 1.7 µm BEH particles, with 100 mmol L<sup>-1</sup> ammonium formate, pH 4.4, as solvent A and acetonitrile as solvent B. The samples were prepared in acetonitrile,  $\psi(\text{sample, acetonitrile}) = 20:80$ . The separation method used a linear gradient of 75% to 62% acetonitrile (vol/vol) at flow rate of 0.4 mL/min in a 25-minute analytical run. Samples were maintained at 10 °C before injection, and the separation temperature was 60 °C. The system was calibrated using an external standard of hydrolyzed and 2-AB labeled glucose oligomers from which the retention times for the individual glycans were converted to glucose units. Data processing was performed using an automatic processing method with a traditional integration algorithm after which each chromatogram was manually corrected to maintain the same intervals of integration for all the samples. The chromatograms were all separated in the same manner into 24 peaks and the amount of glycans in each peak was expressed as percentage of total integrated area (% Area) (36).

### **Participating studies and genetic data pre-processing**

All genotyping, quality control, imputation and genome-wide association studies were performed in the respective research centres. Details of participating studies can be seen in Appendix Table 1 and details of genetic analyses can be seen in Appendix Tables 2, 3, and 4.

**Appendix Table 1. Participating studies.**

| Cohort name          | Full name of the study                        | Study design                                       | Technology | # Analysed | Median (range) | Age | F    | M   |
|----------------------|-----------------------------------------------|----------------------------------------------------|------------|------------|----------------|-----|------|-----|
| TwinsUK (50, 51)     | UK Adult Twin Register                        | Population based                                   | UPLC       | 4479       | 54 (17-83)     |     | 4937 | 0   |
| ORCADES (52)         | The Orkney Complex Disease Study              | Population Based                                   | UPLC       | 1960       | 54 (16-100)    |     | 1236 | 794 |
| CROATIA-Korcula (53) | 10001 Dalmatians                              | Population Based                                   | UPLC       | 849        | 57 (18-98)     |     | 595  | 320 |
| CROATIA-Vis (54)     | 10001 Dalmatians                              | Population Based                                   | UPLC       | 802        | 57 (18-93)     |     | 521  | 369 |
| EGCUT (55)           | Estonian Center, University of Tartu          | Genome Based, selected for developing IBD, RA, CRC | UPLC       | 575        | 71 (31-88)     |     | 290  | 285 |
| FINRISK (56)         | The National FINRISK Study                    | Disease susceptibility                             | UPLC       | 552        | 53 (24-74)     |     | 400  | 392 |
| COGS (57, 58)        | Colorectal Cancer Genetics Study              | Cancer Susceptibility population based controls    | UPLC       | 494        | 53 (21-74)     |     | 244  | 284 |
| SDRNT1BIO (59)       | Scottish Research Network 1 Bioresource Study | Diabetes Type Patient cohort                       | UPLC       | 767        | 43 (16-94)     |     | 401  | 417 |
| LLS (60)             | Leiden Longevity Study                        | Family based                                       | LC-ESI-MS  | 1841       | 59 (30-79)     |     | 974  | 867 |

**Appendix Table 2. Genotyping overview.**

| Cohort                 | Platform                                       | ID call rate | MAF  | SNP call rate | HWE P   | #SNPs that met QC |
|------------------------|------------------------------------------------|--------------|------|---------------|---------|-------------------|
| TwinsUK                | Illumina HumanHap300 and Illumina HumanHap610Q | >95%         | 0.01 | >98%          | >1e-06  | 553487            |
| ORCADES                | HumanHap300v2 and OmniExpress                  | >97%         | 0.01 | >98%          | >10e-10 | 741151            |
| CROATIA-Korcula        | Illumina 370CNV Phase 1 and HumanHap DUO/QUAD  | >97%         | 0.01 | >98%          | >10e-06 | 316730            |
| CROATIA-Vis            | Illumina HumanHap300v1                         | >95%         | 0.01 | >98%          | >10e-06 | 308996            |
| EGCUT                  | Illumina OmniExpress                           | >95%         | 0.01 | >95%          | >10e-6  | 691978            |
| FINRISK                | Illumina HumanHap 610-Quad                     | >95%         | 0.01 | >95%          | >10e-6  | 485919            |
| COGS                   | Illumina HumanHap300 and HumanHap240S          | >95%         | 0.01 | >95%          | 0.00001 | 514177            |
| SDRNT1BIO              | Illumina OmniExpress                           | >95%         | 0.01 | >95%          | >1e-06  | 690798            |
| Generation Scotland    | Illumina HumanOmniPlusExome                    | >98%         | 0.01 | >97%          | >1e-06  | 706980            |
| Leiden Longevity Study | Illumina660 W; Illumina OmniExpress            | >95%         | 0.01 | >95%          | > 1e-04 | 296619            |

ID call rate - percentage of SNPs successfully genotyped in every individual; SNP call rate - percentage of samples in which the given genotype was successfully called; HWE - Hardy-Weinberg Equilibrium; MAF - minor allele frequency

**Appendix Table 3. Overview of imputation software and reference panels.**

| Cohort                 | Imputation software       | Reference panel                                                 |
|------------------------|---------------------------|-----------------------------------------------------------------|
| TwinsUK                | IMPUTE2                   | 1000 Genomes                                                    |
| ORCADES                | SHAPEIT/Impute2           | 1000 Genomes                                                    |
| CROATIA-Korcula        | MACH version 1.15         | HapMap2 release 22                                              |
| CROATIA-Vis            | MACH version 1.15         | HapMap2 release 22                                              |
| EGCUT                  | IMPUTE2                   | HapMap2 release 22                                              |
| FINRISK                | SHAPEIT v1/ IMPUTE v2.2.2 | 1000 Genomes                                                    |
| COGS                   | SHAPEIT/Impute2           | 1000 Genomes, phase 1 Integrated haplotypes, released June 2014 |
| SDRNT1BIO              | ShapeIt2/IMPUTE2          | 1000 Genomes                                                    |
| Generation Scotland    | ShapeIt2/IMPUTE2          | 1000 Genomes                                                    |
| Leiden Longevity Study | IMPUTE2                   | HapMap2 release 22                                              |

### **Glycan data pre-processing**

Each of the 24 raw glycan intensities was divided by the total chromatographic area of the sample, followed by log transformation and exclusion of extreme values that most likely present technical outliers. Batch correction was performed with an empirical Bayes method (61), as implemented in the “ComBat” function of “sva” (37) R package. Derived traits, traits combining glycans with similar structural and chemical properties (for example – fucosylation – sum of all glycans that have core fucose) were then computed on exponentiated measured glycans, using the “iudt” and “ildt” functions from the glycanr package (62), resulting in a final list of 77 glycan traits(36). The list of directly measured and derived glycan traits, together with formulas used for their calculation can be seen in the Appendix Table 4. The same procedure, with the difference of normalising glycopeptide data within subclass rather than on the whole dataset was applied to LCMS glycan data.

## Appendix Table 4. Description of structures for UPLC IgG glycans.

Adapted from Pucic *et al*(36)

| GWAS                          |                                                                                                                                                                        |                                                                                                                              |
|-------------------------------|------------------------------------------------------------------------------------------------------------------------------------------------------------------------|------------------------------------------------------------------------------------------------------------------------------|
| Name                          | Glycan trait/Formula                                                                                                                                                   | DESCRIPTION                                                                                                                  |
| <b>Measured glycan traits</b> |                                                                                                                                                                        |                                                                                                                              |
| IGP1                          | GP1                                                                                                                                                                    | The percentage of FA1 glycan in total IgG glycans                                                                            |
| IGP2                          | GP2                                                                                                                                                                    | The percentage of G0 glycan in total IgG glycans                                                                             |
| IGP3                          | GP4                                                                                                                                                                    | The percentage of G0F glycan in total IgG glycans                                                                            |
| IGP4                          | GP5                                                                                                                                                                    | The percentage of M5 glycan in total IgG glycans                                                                             |
| IGP5                          | GP6                                                                                                                                                                    | The percentage of G0FN glycan in total IgG glycans                                                                           |
| IGP6                          | GP7                                                                                                                                                                    | The percentage of G1 glycan in total IgG glycans                                                                             |
| IGP7                          | GP8                                                                                                                                                                    | The percentage of G1F[6] glycan in total IgG glycans                                                                         |
| IGP8                          | GP9                                                                                                                                                                    | The percentage of G1[3]F glycan in total IgG glycans                                                                         |
| IGP9                          | GP10                                                                                                                                                                   | The percentage of G1[6]FN glycan in total IgG glycans                                                                        |
| IGP10                         | GP11                                                                                                                                                                   | The percentage of G1[3]FN glycan in total IgG glycans                                                                        |
| IGP11                         | GP12                                                                                                                                                                   | The percentage of G2 glycan in total IgG glycans                                                                             |
| IGP12                         | GP13                                                                                                                                                                   | The percentage of G2N glycan in total IgG glycans                                                                            |
| IGP13                         | GP14                                                                                                                                                                   | The percentage of G2F glycan in total IgG glycans                                                                            |
| IGP14                         | GP15                                                                                                                                                                   | The percentage of G2FN glycan in total IgG glycans                                                                           |
| IGP15                         | GP16                                                                                                                                                                   | The percentage of G1FS1 glycan in total IgG glycans                                                                          |
| IGP16                         | GP17                                                                                                                                                                   | The percentage of G2S1 glycan in total IgG glycans                                                                           |
| IGP17                         | GP18                                                                                                                                                                   | The percentage of G2FS1 glycan in total IgG glycans                                                                          |
| IGP18                         | GP19                                                                                                                                                                   | The percentage of G2FNS1 glycan in total IgG glycans                                                                         |
| IGP19                         | GP20                                                                                                                                                                   | Structure not determined                                                                                                     |
| IGP20                         | GP21                                                                                                                                                                   | The percentage of G2S2 glycan in total IgG glycans                                                                           |
| IGP21                         | GP22                                                                                                                                                                   | The percentage of G2NS2 glycan in total IgG glycans                                                                          |
| IGP22                         | GP23                                                                                                                                                                   | The percentage of G2FS2 glycan in total IgG glycans                                                                          |
| IGP23                         | GP24                                                                                                                                                                   | The percentage of G2FNS2 glycan in total IgG glycans                                                                         |
| <b>Derived glycan traits</b>  |                                                                                                                                                                        |                                                                                                                              |
| IGP24                         | $\text{SUM}(\text{GP16} + \text{GP18} + \text{GP23}) / \text{SUM}(\text{GP16} + \text{GP18} + \text{GP23} + \text{GP8} + \text{GP9} + \text{GP14}) * 100$              | The percentage of sialylation of fucosylated galactosylated structures without bisecting GlcNAc in total IgG glycans         |
| IGP25                         | $\text{SUM}(\text{GP19} + \text{GP24}) / \text{SUM}(\text{GP19} + \text{GP24} + \text{GP10} + \text{GP11} + \text{GP15}) * 100$                                        | The percentage of sialylation of fucosylated galactosylated structures with bisecting GlcNAc in total IgG glycans            |
| IGP26                         | $\text{SUM}(\text{GP16} + \text{GP18} + \text{GP23}) / \text{SUM}(\text{GP16} + \text{GP18} + \text{GP23} + \text{GP4} + \text{GP8} + \text{GP9} + \text{GP14}) * 100$ | The percentage of sialylation of all fucosylated structures without bisecting GlcNAc in total IgG glycans                    |
| IGP27                         | $\text{SUM}(\text{GP19} + \text{GP24}) / \text{SUM}(\text{GP19} + \text{GP24} + \text{GP6} + \text{GP10} + \text{GP11} + \text{GP15}) * 100$                           | The percentage of sialylation of all fucosylated structures with bisecting GlcNAc in total IgG glycans                       |
| IGP28                         | $\text{GP16} / \text{SUM}(\text{GP16} + \text{GP8} + \text{GP9}) * 100$                                                                                                | The percentage of monosialylation of fucosylated monogalactosylated structures without bisecting GlcNAc in total IgG glycans |
| IGP29                         | $\text{GP18} / \text{SUM}(\text{GP18} + \text{GP14} + \text{GP23})$                                                                                                    | The percentage of monosialylation of fucosylated                                                                             |



|       |                                                                                               |                                                                                                                          |
|-------|-----------------------------------------------------------------------------------------------|--------------------------------------------------------------------------------------------------------------------------|
|       | * 100                                                                                         | digalactosylated structures without bisecting GlcNAc in total IgG glycans                                                |
| IGP30 | $\text{GP23} / \text{SUM}(\text{GP23} + \text{GP14} + \text{GP18})$<br>* 100                  | The percentage of disialylation of fucosylated digalactosylated structures without bisecting GlcNAc in total IgG glycans |
| IGP31 | $\text{GP19} / \text{SUM}(\text{GP19} + \text{GP15} + \text{GP24})$<br>* 100                  | The percentage of monosialylation of fucosylated digalactosylated structures with bisecting GlcNAc in total IgG glycans  |
| IGP32 | $\text{GP24} / \text{SUM}(\text{GP24} + \text{GP15} + \text{GP19})$<br>* 100                  | The percentage of disialylation of fucosylated digalactosylated structures with bisecting GlcNAc in total IgG glycans    |
| IGP33 | $\text{SUM}(\text{GP16} + \text{GP18} + \text{GP19}) / \text{SUM}(\text{GP23} + \text{GP24})$ | Ratio of all fucosylated monosialylated and disialylated structures (+/- bisecting GlcNAc) in total IgG glycans          |
| IGP34 | $\text{SUM}(\text{GP16} + \text{GP18}) / \text{GP23}$                                         | Ratio of fucosylated monosialylated and disialylated structures (without bisecting GlcNAc) in total IgG glycans          |
| IGP35 | $\text{GP19} / \text{GP24}$                                                                   | Ratio of fucosylated monosialylated and disialylated structures (with bisecting GlcNAc) in total IgG glycans             |
| IGP36 | $\text{SUM}(\text{GP19} + \text{GP24}) / \text{SUM}(\text{GP16} + \text{GP18} + \text{GP23})$ | Ratio of all fucosylated sialylated structures with and without bisecting GlcNAc in total IgG glycans                    |
| IGP37 | $\text{GP19} / \text{SUM}(\text{GP16} + \text{GP18})$                                         | Ratio of fucosylated monosialylated structures with and without bisecting GlcNAc in total IgG glycans                    |
| IGP38 | $\text{GP19} / \text{SUM}(\text{GP16} + \text{GP18} + \text{GP19})$                           | The incidence of bisecting GlcNAc in all fucosylated monosialylated structures in total IgG glycans                      |
| IGP39 | $\text{GP24} / \text{GP23}$                                                                   | Ratio of fucosylated disialylated structures with and without bisecting GlcNAc in total IgG glycans                      |
| IGP40 | $\text{GP24} / \text{SUM}(\text{GP23} + \text{GP24})$                                         | The incidence of bisecting GlcNAc in all fucosylated disialylated structures in total IgG glycans                        |
| IGP41 | $\text{GP1} / \text{GPn} * 100$                                                               | The percentage of FA1 glycan in total neutral IgG glycans (GPn)                                                          |
| IGP42 | $\text{GP2} / \text{GPn} * 100$                                                               | The percentage of G0 glycan in total neutral IgG glycans (GPn)                                                           |
| IGP43 | $\text{GP4} / \text{GPn} * 100$                                                               | The percentage of G0F glycan in total neutral IgG glycans (GPn)                                                          |
| IGP44 | $\text{GP5} / \text{GPn} * 100$                                                               | The percentage of M5 glycan in total neutral IgG glycans (GPn)                                                           |
| IGP45 | $\text{GP6} / \text{GPn} * 100$                                                               | The percentage of G0FN glycan in total neutral IgG glycans (GPn)                                                         |
| IGP46 | $\text{GP7} / \text{GPn} * 100$                                                               | The percentage of G1 glycan in total neutral IgG glycans (GPn)                                                           |
| IGP47 | $\text{GP8} / \text{GPn} * 100$                                                               | The percentage of G1[6]F glycan in total neutral IgG glycans (GPn)                                                       |
| IGP48 | $\text{GP9} / \text{GPn} * 100$                                                               | The percentage of G1[3]F glycan in total neutral IgG glycans (GPn)                                                       |
| IGP49 | $\text{GP10} / \text{GPn} * 100$                                                              | The percentage of G1[6]FN glycan in total neutral IgG glycans (GPn)                                                      |
| IGP50 | $\text{GP11} / \text{GPn} * 100$                                                              | The percentage of G1[3]FN glycan in total neutral IgG glycans (GPn)                                                      |
| IGP51 | $\text{GP12} / \text{GPn} * 100$                                                              | The percentage of G2 glycan in total neutral IgG glycans (GPn)                                                           |
| IGP52 | $\text{GP13} / \text{GPn} * 100$                                                              | The percentage of G2N glycan in total neutral IgG glycans (GPn)                                                          |

|       |                                                                 |                                                                                                                              |
|-------|-----------------------------------------------------------------|------------------------------------------------------------------------------------------------------------------------------|
| IGP53 | $GP14 / GPn * 100$                                              | The percentage of G2F glycan in total neutral IgG glycans (GPn)                                                              |
| IGP54 | $GP15 / GPn * 100$                                              | The percentage of G2FN glycan in total neutral IgG glycans (GPn)                                                             |
| IGP55 | $SUM(GP1n: GP4n + GP6n)$                                        | The percentage of agalactosylated structures in total neutral IgG glycans                                                    |
| IGP56 | $SUM(GP7n: GP11n)$                                              | The percentage of monogalactosylated structures in total neutral IgG glycans                                                 |
| IGP57 | $SUM(GP12n: GP15n)$                                             | The percentage of digalactosylated structures in total neutral IgG glycans                                                   |
| IGP58 | $SUM(GP1n+ GP4n+ GP6n+ GP8n+ GP9n+ GP10n+ GP11n+ GP14n+ GP15n)$ | The percentage of all fucosylated structures (+/- bisecting GlcNAc) in total neutral IgG glycans                             |
| IGP59 | $SUM(GP1n+ GP4n+ GP6n) / G0n * 100$                             | The percentage of fucosylation of agalactosylated structures in total neutral IgG glycans                                    |
| IGP60 | $SUM(GP8n+ GP9n+ GP10n+ GP11n) / G1n * 100$                     | The percentage of fucosylation of monogalactosylated structures in total neutral IgG glycans                                 |
| IGP61 | $SUM(GP14n+ GP15) / G2n * 100$                                  | The percentage of fucosylation of digalactosylated structures in total neutral IgG glycans                                   |
| IGP62 | $SUM(GP1n+ GP4n+ GP8n+ GP9n+ GP14n)$                            | The percentage of fucosylated structures (without bisecting GlcNAc) in total neutral IgG glycans                             |
| IGP63 | $SUM(GP1n+ GP4n) / G0n * 100$                                   | The percentage of fucosylation of agalactosylated structures (without bisecting GlcNAc) in total neutral IgG glycans         |
| IGP64 | $SUM(GP8n+ GP9n) / G1n * 100$                                   | The percentage of fucosylation of monogalactosylated structures (without bisecting GlcNAc) in total neutral IgG glycans      |
| IGP65 | $GP14n / G2n * 100$                                             | The percentage of fucosylation of digalactosylated structures (without bisecting GlcNAc) in total neutral IgG glycans        |
| IGP66 | $SUM(GP6n + GP10n + GP11n + GP15n)$                             | The percentage of fucosylated structures (with bisecting GlcNAc) in total neutral IgG glycans                                |
| IGP67 | $GP6n / G0n * 100$                                              | The percentage of fucosylation of agalactosylated structures (with bisecting GlcNAc) in total neutral IgG glycans            |
| IGP68 | $SUM(GP10n + GP11n) / G1n * 100$                                | The percentage of fucosylation of monogalactosylated structures (with bisecting GlcNAc) in total neutral IgG glycans         |
| IGP69 | $GP15n / G2n * 100$                                             | The percentage of fucosylation of digalactosylated structures (with bisecting GlcNAc) in total neutral IgG glycans           |
| IGP70 | $FBn / Fn * 100$                                                | Ratio of fucosylated structures with and without bisecting GlcNAc in total neutral IgG glycans                               |
| IGP71 | $FBn / Fn total * 100$                                          | The incidence of bisecting GlcNAc in all fucosylated structures in total neutral IgG glycans                                 |
| IGP72 | $Fn / (GP13n + FBn)$                                            | Ratio of fucosylated non-bisecting GlcNAc structures and all structures with bisecting GlcNAc in total neutral IgG glycans   |
| IGP73 | $GP13n / (Fn + FBn) * 1000$                                     | Ratio of structures with bisecting GlcNAc and all fucosylated structures (+/- bisecting GlcNAc) in total neutral IgG glycans |
| IGP74 | $GP15n / GP14n$                                                 | Ratio of fucosylated digalactosylated structures with and                                                                    |

|       |                                |                                                                                                                                                                |
|-------|--------------------------------|----------------------------------------------------------------------------------------------------------------------------------------------------------------|
|       |                                | without bisecting GlcNAc in total neutral IgG glycans                                                                                                          |
| IGP75 | $GP15n/(GP14n + GP15n) * 100$  | The incidence of bisecting GlcNAc in all fucosylated digalactosylated structures in total neutral IgG glycans                                                  |
| IGP76 | $GP14n/(GP13n + GP15n)$        | Ratio of fucosylated digalactosylated non-bisecting GlcNAc structures and all digalactosylated structures with bisecting GlcNAc in total neutral IgG glycans   |
| IGP77 | $GP13n/(GP14n + GP15n) * 1000$ | Ratio of digalactosylated structures with bisecting GlcNAc and all fucosylated digalactosylated structures (+/- bisecting GlcNAc) in total neutral IgG glycans |

### Genome-wide association studies

Prior to analyses, each cohort received quality controlled glycan data (glycan data were pre-processed by the phenotype provider) and an analysis plan for genome-wide association studies. GWAS were performed on age, sex and cohort specific covariate corrected glycan data and imputed genotypes, taking into account relatedness and population stratification and assuming an additive model of association.

Two independent analysts processed each of 77 individual-level GWAS per cohort based on a protocol suggested by Winkler *et al* (38) and involved removing uninformative and SNPs of low imputation quality ( $rsq\_hat < 0.3$  and MACH (63)), proper info  $< 0.4$  (IMPUTE (64, 65)), as well as verification of trait transformations. A summary of quality control outcomes can be seen in Appendix Table 6.

Each cleaned set of individual GWA studies was pooled independently by two analysts. Meta-analyses were performed using fixed effect inverse-variance method implemented in METAL (39). Effect estimates and p-values of the final meta-analyses were compared and showed no inconsistencies.

Prior to meta-analysis, each GWA study was corrected for genomic control inflation factor. The genomic control inflation factor  $\lambda$  varied from 0.95 to 1.05, suggesting little residual influence of population stratification. Additional genomic control was performed on the aggregated meta-analysis results.

**Appendix Table 5. Details of genome-wide association analyses.**

| Cohort                 | Method used for correction for genetic substructure                                                                              | Covariates                         | GWAS Software |
|------------------------|----------------------------------------------------------------------------------------------------------------------------------|------------------------------------|---------------|
| TwinsUK                | Linear mixed models (LMM) with kinship matrix                                                                                    | Age, sex                           | SNPTEST       |
| ORCADES                | LMM with kinship matrix                                                                                                          | age, sex, genotyping chip          | ProbABEL      |
| CROATIA-Korcula        | LMM with kinship matrix                                                                                                          | age, sex                           | ProbABEL      |
| CROATIA-Vis            | LMM with kinship matrix                                                                                                          | age, sex                           | ProbABEL      |
| EGCUT                  | 5 first principle components                                                                                                     |                                    | SNPTEST       |
| FINRISK                | First 10 genomic PCA dimensions tested for association with endpoint, all with $P > 0.05$ , thus omitted from the final analysis | age+sex+genotyping batch+IBD+RA+CC | SNPTEST       |
| COGS                   | None needed                                                                                                                      | Age, sex                           | SNPTEST       |
| SDRNT1BIO              | None needed                                                                                                                      | Age, sex                           | SNPTEST       |
| Leiden Longevity Study | LMM with kinship matrix                                                                                                          | Age, sex                           | QT-assoc      |

**Appendix Table 6. Individual GWAS file-level quality control.**

Showing the results for only one random glycan given that all 77 glycan files in every cohort had the same number of SNPs removed. Shown are only filters that removed at least 1 SNP.

| cohort          | numSNPsIn | numSNPsOut | Monomorph | Missing P | MAClet6 | Low Information |
|-----------------|-----------|------------|-----------|-----------|---------|-----------------|
| TwinsUK         | 2130725   | 1939891    | 0         | 0         | 167937  | 22897           |
| ORCADES         | 2505100   | 2477038    | 671       | 0         | 22509   | 4882            |
| CROATIA-Korcula | 2543887   | 2392625    | 142       | 11623     | 18955   | 120542          |
| CROATIA-Vis     | 2543887   | 2448535    | 192       | 1465      | 29725   | 63970           |

numSNPsIn – number of SNPs before QC; numSNPsOut - number of SNPs after QC; Monomorph – number of SNPs excluded because they were monomorphic (EAF =1 or EAF = 0); missing p – number of SNPs excluded because of the missing p-value; MAClet6 – number of SNPs removed because minor allele count was smaller than 6; Low information – number of SNPs excluded because of the poor quality

### Validation Genome-wide association studies

Additional validation of findings was performed by running GWAS on 1841 samples from the Leiden Longevity Study, measured with liquid chromatography electrospray mass spectrometry (LCMS) as previously described (66). Immunoglobulin G has two regions – Fab region that interacts with antigens and Fc region that interacts with effector cells of the immune system. Both regions can have covalently bound glycans. IgG molecules can further

be divided in 4 subclasses, each with different structure and function (67). While UPLC provides information of total IgG glycosylation (glycans bound to both Fab and Fc regions of IgG), LCMS quantifies only glycans bound to the Fc region. As a result, to fully replicate an UPLC finding, one would need to combine results from three different glycan traits measured with LCMS (IgG2 and IgG3 are not distinguishable with LCMS). For example, to replicate association with G0 glycan in total IgG glycans (UPLC trait IGP2), one would need to combine association results from three LCMS glycan traits – namely IgG1\_G0, IgG2\_G0 and IgG4\_G0), with a caveat that UPLC G0 glycan trait contains information on both Fab and Fc G0 glycan, while the three LCMS traits will contain information of only Fc G0 glycan levels. In addition, not all UPLC measured glycans have their counterpart in LCMS data. For example, association of UPLC IGP35 (ratio of mono- and di-sialylated glycans) and rs7700895 cannot be validated with LCMS data since disialylated glycans are bound only to the Fab region, whose glycosylation is not measured with the LCMS method (68). Given these differences between discovery and validation datasets, we aimed at replicating association of the top SNP in every locus with any LCMS glycan trait, aiming at validating association with the locus rather than specific glycan-SNP pair. Genome-wide association studies were ran for both 50 directly measured and 155 derived LCMS glycan traits and SNPs mapping to 27 significantly associated loci. Given that 155 derived traits are linear combination of the 50 directly measured traits we set the validation significance level  $\leq 3.7e-05$  (Bonferroni correction for 50 glycan traits and 27 loci). More details about the LMCS traits that were significantly associated with the top SNPs can be seen in Appendix Table 7.

**Appendix Table 7. Description of structures for LCMS glycans. Adapted from Huffman *et al*(46)**

| GWAS Name                     | Trait/Formula                                               | DESCRIPTION                                                                                                                                |
|-------------------------------|-------------------------------------------------------------|--------------------------------------------------------------------------------------------------------------------------------------------|
| <b>Measured glycan traits</b> |                                                             |                                                                                                                                            |
| LC_IGP7                       | IgG1_G1FS1                                                  | The percentage of FA2G1S1 glycan in total IgG1 glycans                                                                                     |
| LC_IGP11                      | IgG1_G0                                                     | The percentage of A2glycan in total IgG1 glycans                                                                                           |
| LC_IGP19                      | IgG1_G1NS1                                                  | The percentage of A2BG1S1 glycan in total IgG1 glycans                                                                                     |
| LC_IGP92                      | IgG2_G2FN                                                   | The percentage of FA2BG2 glycan in total IgG2 glycans                                                                                      |
| LC_IGP180                     | IgG4_G2FS1                                                  | The percentage of FA2G2S1 glycan in total IgG4 glycans                                                                                     |
| <b>Derived traits</b>         |                                                             |                                                                                                                                            |
| LC_IGP27                      | $\text{IgG1 SUM(G1S1+G2S1)/SUM(G0+G1+G1S1+G2+G2S1)*100}$    | The percentage of monosialylation of all afucosylated structures without bisecting GlcNAc in total IgG1 glycans                            |
| LC_IGP34                      | $\text{IgG1 SUM(G1FS1+G2FS1)/SUM(G1F+G1FS1+G2F+G2FS1)*100}$ | The percentage of monosialylation of fucosylated galactosylated structures without bisecting GlcNAc in total IgG1 glycans                  |
| LC_IGP40                      | $\text{IgG1 FBG1S1/(FBG1+FBG1S1)}$                          | The percentage of monosialylation of fucosylated monogalactosylated (with bisecting GlcNAc) structures in total IgG1 glycans               |
| LC_IGP48                      | $\text{IgG1\_G2Fn/IgG1 GPn*100}$                            | The percentage of FA2G2 glycan in neutral IgG1 glycans                                                                                     |
| LC_IGP63                      | $\text{IgG1 SUM(G1Fn+G1FNn)/G1n*100}$                       | The percentage of fucosylation of monogalactosylated structures in neutral IgG1 glycan fraction                                            |
| LC_IGP76                      | $\text{IgG1 SUM(G2Nn+G2FNn)/G2n*100}$                       | The incidence of bisecting GlcNAc (+/- core Fuc) in digalactosylated structures in neutral IgG1 glycan fraction                            |
| LC_IGP81                      | $\text{IgG1 Fn/Bn}$                                         | Ratio of fucosylated structures without bisecting GlcNAc and afucosylated structures with bisecting GlcNAc in neutral IgG1 glycan fraction |
| LC_IGP84                      | $\text{IgG1 FBn/Bn total*100}$                              | Ratio of fucosylated structures without bisecting GlcNAc and afucosylated structures with bisecting GlcNAc in neutral IgG1 glycan fraction |
| LC_IGP113                     | $\text{IgG2 SUM(G1S1+G2S1)/SUM(G0+G1+G1S1+G2+G2S1)*100}$    | The percentage of monosialylation of all afucosylated structures without bisecting GlcNAc in total IgG2 glycans                            |
| LC_IGP115                     | $\text{IgG2 G2S1/SUM(G2+G2S1)*100}$                         | The percentage of monosialylation of afucosylated digalactosylated (without bisecting GlcNAc) structures in total IgG2 glycans             |
| LC_IGP122                     | $\text{IgG2 G1FS1/SUM(G1F+G1FS1)*100}$                      | The percentage of monosialylation of fucosylated monogalactosylated (without bisecting GlcNAc) structures in total IgG2 glycans            |
| LC_IGP133                     | $\text{IgG2 IgG2\_G1Fn/IgG2 GPn*100}$                       | The percentage of FA2G1 glycan in neutral IgG2 glycans                                                                                     |
| LC_IGP154                     | $\text{IgG2 G2Fn/G2n*100}$                                  | The percentage of fucosylation (without bisecting GlcNAc) of digalactosylated structures in neutral IgG2 glycan fraction                   |
| LC_IGP155                     | $\text{IgG2 SUM(G0FNn+G1FNn+G2FNn)}$                        | The percentage of fucosylated (with bisecting GlcNAc) structures in neutral IgG2 glycan fraction                                           |
| LC_IGP156                     | $\text{IgG2 G0FNn/G0n*100}$                                 | The percentage of fucosylation (with bisecting GlcNAc) of agalactosylated structures in neutral IgG2 glycan fraction                       |
| LC_IGP161                     | $\text{IgG2 SUM(G1Nn+G1FNn)/G1n*100}$                       | The incidence of bisecting GlcNAc (+/- core Fuc) in monogalactosylated structures in neutral IgG2 glycan fraction                          |
| LC_IGP183                     | $\text{IgG4 SUM(G0FN+G1FN+G2FN)}$                           | The incidence of bisecting GlcNAc of IgG4                                                                                                  |

|           |                                                            |                                                                                                                           |
|-----------|------------------------------------------------------------|---------------------------------------------------------------------------------------------------------------------------|
| LC_IGP187 | IgG4 SUM(G1FS1+G2FS1)/<br>SUM(G1F+G1FS1+G2F+G2FS1)*100     | The percentage of monosialylation of fucosylated galactosylated structures without bisecting GlcNAc in total IgG4 glycans |
| LC_IGP188 | IgG4 SUM(G1FS1+G2FS1)/<br>SUM(G0F+G1F+G1FS1+G2F+G2FS1)*100 | The percentage of monosialylation of all fucosylated structures without bisecting GlcNAc in total IgG4 glycans            |
| LC_IGP201 | IgG4 IgG4_G1FNn/IgG4 GPn*100                               | The percentage of FA2BG1 glycan in neutral IgG4 glycans                                                                   |

### SMR/HEIDI analysis for pleiotropy with gene expression and complex traits

We used Summary data-based Mendelian Randomization (SMR) analysis followed by the Heterogeneity in Dependent Instruments (HEIDI) test to identify potential pleiotropic effects of identified loci on glycan levels and other complex traits including gene expression levels in certain tissues (12). SMR analysis provides evidence for pleiotropy, but is unable to define whether both traits are affected by the same underlying causal polymorphism. The latter is specified by a HEIDI test that distinguishes pleiotropy from linkage disequilibrium (indicating that there are two distinct causal variants, in linkage disequilibrium, but each regulating different trait). We started by selecting the top genome-wide significant SNP for each glycan in every locus and checked if association results for specific probe/complex trait are reported in the region of interest. List of the tested complex traits can be seen in the Appendix Table 8.

In our implementation of the HEIDI test we first compute statistic  $T_H = \sum_i^m z_{d(i)}^2$ , where m is the number of markers selected for the test and  $z_{d(i)}$  is the scaled measure of deviation of the ratio of the effect estimates from the two GWAS from that at the top associated SNP (see Zhu et al. work for details (12)). LD matrix (r2) was computed with PLINK 1.9 using 1000 Genomes data for 503 European individuals (<http://www.internationalgenome.org/data/>). Up to 20 SNPs have been selected for this test using the following procedure:

- 1) Define eligible SNPs in the region +/- 250 kb from the top primary GWAS association, by selecting those that have  $\chi^2 > 10$  in primary GWAS, and have results reported in secondary GWAS
- 2) Make empty "target" (S\_t) and "rejected" (S\_r) SNP sets
- 3) Select current SNP with the lowest p from the primary GWAS that is neither in the target nor in the rejected set
- 4) If current SNPs has  $r^2 > 0.9$  (computed with PLINK 1.9) with any SNP in the target SNP set or  $MAF \leq 0.03$ , add current SNP to the rejected set
- 5) Otherwise add current SNP to the target set
- 6) Repeat from the third step until either the eligible SNP set is exhausted or the target set has 20 SNPs
- 7) Use target set for HEIDI test

In case the number of SNPs was less than 3, no test was performed. The method was implemented using Python 3.5 as the main programming language, Pandas 1.19.2 (<https://conference.scipy.org/proceedings/scipy2010/mckinney.html>) for data processing, Dask 0.14.1 (<http://dask.pydata.org/>) for distributed data pre-processing, Bokeh 1.12.4 (<http://bokeh.pydata.org/>) for graphics.



**Appendix Table 8. Summary-level statistics downloaded for SMR or HEIDI test.**

| Trait                      | short name  | Link to data                                                                                                                                                                                                                        | reference           |
|----------------------------|-------------|-------------------------------------------------------------------------------------------------------------------------------------------------------------------------------------------------------------------------------------|---------------------|
| Ankylosing spondylitis     | spondylitis | <a href="https://www.immunobase.org/downloads/protected_data/iChip_Data/hg19_gwas_ic_as_igas_4_19_1.tab.gz">https://www.immunobase.org/downloads/protected_data/iChip_Data/hg19_gwas_ic_as_igas_4_19_1.tab.gz</a>                   | Cortes et al (69)   |
| Asthma                     | asthma      | <a href="https://grasp.nhlbi.nih.gov/downloads/ResultsOctober2016/Moffatt/asthma_gabriel_results.zip">https://grasp.nhlbi.nih.gov/downloads/ResultsOctober2016/Moffatt/asthma_gabriel_results.zip</a>                               | Moffatt et al (70)  |
| Crohn's Disease            | crohn       | <a href="https://www.ibdgenetics.org/downloads.html">https://www.ibdgenetics.org/downloads.html</a>                                                                                                                                 | Liu et al (71)      |
| HDL                        | hdl         | <a href="http://csg.sph.umich.edu/abecasis/public/lipids2013/">http://csg.sph.umich.edu/abecasis/public/lipids2013/</a>                                                                                                             | Willer et al (72)   |
| Height                     | height      | <a href="http://portals.broadinstitute.org/collaboration/giant/index.php/GIANT_consortium_data_files">http://portals.broadinstitute.org/collaboration/giant/index.php/GIANT_consortium_data_files</a>                               | Wood et al (73)     |
| Inflammatory bowel disease | ibd         | <a href="https://www.ibdgenetics.org/downloads.html">https://www.ibdgenetics.org/downloads.html</a>                                                                                                                                 | Liu et al (71)      |
| Parkinson's Disease        | parkinson   | <a href="https://grasp.nhlbi.nih.gov/downloads/ResultsOctober2016/Pankratz/Pankratz_Parkinsons_22687-SuppTable1.txt">https://grasp.nhlbi.nih.gov/downloads/ResultsOctober2016/Pankratz/Pankratz_Parkinsons_22687-SuppTable1.txt</a> | Pankratz et al (74) |
| Primary biliary cirrhosis  | cirrhosis   | <a href="https://www.immunobase.org/downloads/protected_data/GWAS_Data/hg19_gwas_pbc_cordell_4_20_0.tab">https://www.immunobase.org/downloads/protected_data/GWAS_Data/hg19_gwas_pbc_cordell_4_20_0.tab</a>                         | Cordell et al (75)  |
| Ulcerative colitis         | uc          | <a href="ftp://ftp.sanger.ac.uk/pub/consortia/ibdgenetics/ucmeta-sumstats.txt.gz">ftp://ftp.sanger.ac.uk/pub/consortia/ibdgenetics/ucmeta-sumstats.txt.gz</a>                                                                       | Liu et al (71)      |
| Rheumatoid Arthritis       | ra          | <a href="https://grasp.nhlbi.nih.gov/downloads/ResultsOctober2016/Okada/RA_GWASmeta_European_v2.txt.gz">https://grasp.nhlbi.nih.gov/downloads/ResultsOctober2016/Okada/RA_GWASmeta_European_v2.txt.gz</a>                           | Okada et al (76)    |

### Functional network of genes associated with IgG N-glycosylation

Only 23 glycans are directly measured and all others are a function of these measured traits and are, therefore, correlated to different extent. Especially high phenotypic correlation can be observed between IGP1-IG14 and IGP41-IGP54 (Appendix Figure 1). These traits represent the same glycan traits but normalised in a different fashion. Since charged glycans are more prone to experimental error, glycan traits IGP41-IGP54 are defined as IGP1-IGP15 normalised by the total area of these peaks (instead of the total area of the whole chromatogram). Because of the redundancy of these glycan traits, they were removed prior the association analysis. Permutation analysis was then performed to assess the impact of correlations between remaining glycans on the glycome-wide pairwise SNP effect

associations and additionally validate the observed network edges as described in the main Methods.

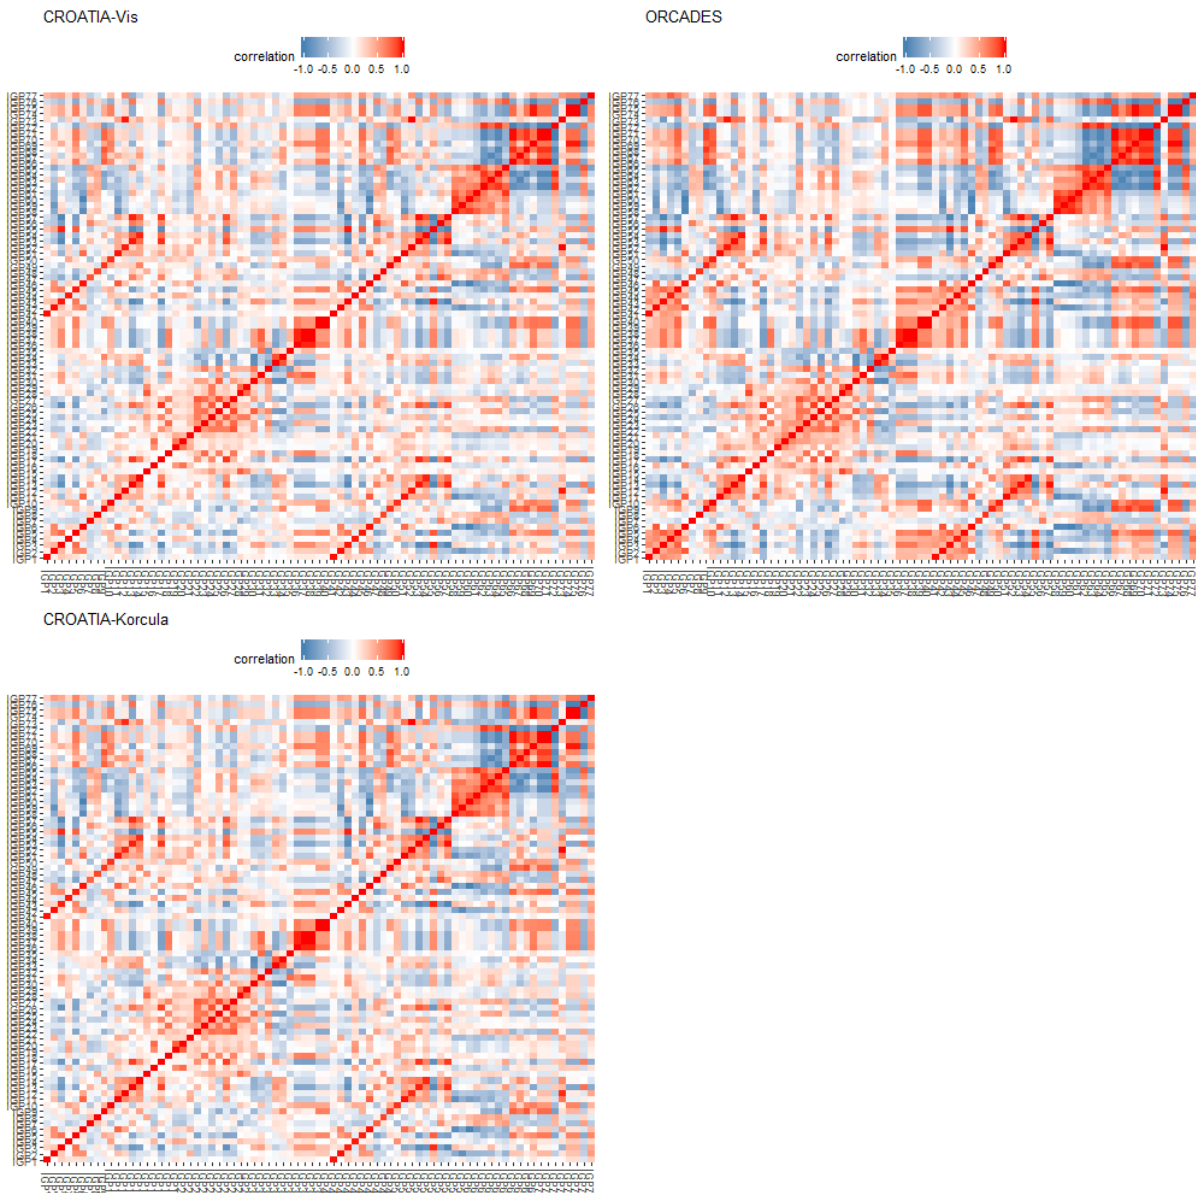

**Appendix Figure 1. Phenotypic correlation of UPLC IgG N-glycans.**

ChIP-seq data (.narrowPeak files) for the transcription factors (TFs) that we reported as associated with IgG glycosylation (Supplementary Table 4) was downloaded from <http://hgdownload.cse.ucsc.edu/goldenPath/hg19/encodeDCC/> for the GM12878 lymphoblastoid cell line. For transcription factors that are not available in the ENCODE data the PWMs used were obtained from previously known motifs in the ENCODE (77), JASPAR (78) and Hocomoco (79) databases. The peak-motifs tool (18) in Regulatory Sequence

Analysis Tools (RSAT) was used for motif discovery in the peak sequences of ChIP-seq datasets.

Allele specific binding of the TFs was tested using the matrix-scan tool (80) in RSAT. Sequences surrounding the top SNPs from the GWAS were obtained from ensemble (81). Position weight matrices (PWMs) of the discovered motifs outputted from peak-motifs were used to determine whether these SNPs fall within the binding sites of the TFs. The same analysis was performed for all significantly and suggestively associated IgG glycosylation SNPs (N=1723) and non-associated SNPs within 50kb of glycosylation loci (N=4389).

Allele specific binding was estimated by comparing binding weights of the motifs to the sequence were between reference and alternate alleles. A SNP was considered to influence TF binding if one of the alleles significantly affected its binding ( $p \leq 0.05/2764712 \sim 1.8 \times 10^{-8}$ , corrected for the total number of performed tests).

### ***In vitro* validation of the functional links between *IKZF1* and *FUT8***

#### **ShRNA cloning, cell culture, transfections and shRNA knockdown**

Four short hairpin RNAs (shRNA) targeting the coding region or 3' UTR of all *IKZF1* isoforms were designed using BlockIT RNAi Designer (<https://rnaidesigner.thermofisher.com/rnaiexpress/>). Single stranded oligos for *IKZF1* shRNA and a sequence with no corresponding target in the human genome (random shRNA, 5'-GATCATGTAGATACGCTCA-3') were annealed and cloned into pENTR/H1/TO vector using the BLOCK-iT™ Inducible H1 RNAi Entry vector kit (Invitrogen). The vectors were propagated, sequenced and used for electroporation of an IgG1-secreting human lymphoblastoid cell line (LCL), MATAT6. MATAT6 cells were maintained in RPMI1640

medium supplemented with 10% fetal calf serum (FCS), 4 mM L-glutamine, 1 mM oxaloacetate, 0.45 mM sodium pyruvate, 1.25 mM MOPS, bovine insulin, 100 U/ml penicillin/streptomycin. All experiments were performed on exponentially growing cells maintained at concentrations  $<1 \times 10^6$ /ml. Cells were electroporated with pENTR-shRNA plasmids using Neon Transfection system (Invitrogen). Electroporation parameters were 1300 V/ 20 ms/ 2 pulses. For each construct, stable bulk cultures constitutively expressing the shRNA were selected with 50 µg/ml zeocin for 14 days prior to removal of antibiotic. RNA was extracted to assess gene knockdown efficiency for each shRNA tested by qPCR, and the IKZF1 shRNA (5'-GGTAAAGTCCTAGCACCAATT-3') resulting in most significant knockdown was used for subsequent experiments. Stable bulk cultures were generated from a minimum of 2 independent electroporation reactions.

### **RNA, cDNA and Real-time PCR**

RNA was extracted from MATAT6 cells and stable shRNA lines using the RNeasy Mini kit (Qiagen), following the manufacturer's instructions and supplied buffers. On-column DNase digestion was performed. cDNA was synthesised using Transcriptor High Fidelity cDNA Synthesis Kit (Roche). qPCR was performed using TaqMan Universal PCR Mastermix, No AmpErase UNG, and gene expression assays for *IKZF1* (Hs00958473\_m1), *FUT8* (Hs00189535\_m1), *IKZF3* (Hs00232635\_m1) and *HPRT1* (Hs02800695\_m1) on the Applied Biosystems HT7900. Samples were run in triplicate. Relative gene expression level was determined using the comparative Ct method. Error bars show standard deviation obtained from a minimum of 3 experiments. Statistically significant differences in gene expression were determined using paired t-test.

## **Western blot analysis**

Whole cell lysates were prepared by lysing cells in RIPA Buffer (25 mM Tris-HCl, pH 7.5, 150 mM NaCl, 1% NP-40, 1% sodium deoxycholate, 0.1% SDS) on ice for 1 hour. Jurkat nuclear extract (SC2131, Santa Cruz Biotechnologies) and HEK293T lysates were used as positive and negative controls for IKZF1. Protein concentration was determined by Bradford Assay (Pierce). 10  $\mu$ g of total protein was reduced and denatured prior to separation on 4-12% Bis-Tris NuPAGE gel (Invitrogen) in MOPS Buffer (Invitrogen), before transfer to PVDF membrane. Membranes were blocked in 5% non-fat dried milk in PBST (phosphate buffered saline, 0.5% Tween 20), and probed using the following antibodies: rabbit polyclonal anti-Ikaros (H-100, Santa Cruz Biotechnology), mouse anti-alpha tubulin (Sigma Alrich). Secondary antibodies were horseradish peroxidase conjugated anti-rabbit IgG, or anti-mouse IgG (Sigma Aldrich). Antibody detection was achieved using the enhanced chemiluminescent (ECL) detection system (Amersham Biosciences, UK).

## **Chromatin Immunoprecipitation (ChIP)**

ChIP assays were performed using ExactaChIP buffers (R&D Systems), as described by the manufacturer except for the following modifications. MATAT6 cells cultured at  $1 \times 10^6$  cells/ml of media were collected by centrifugation and resuspended in fresh media. Cells were cross-linked in a final formaldehyde concentration of 1% (w/v) for 5 minutes, followed by the addition of glycine to 125mM and incubation for 10 min. After washing with cold PBS,  $5 \times 10^6$  cells were sonicated 15 times in 30 s pulses at maximum power in 500  $\mu$ l Lysis Buffer (ExactaChIP, R&D Systems) and Complete EDTA-free protease inhibitor (Roche) to shear chromatin to an average length of 500 bp. Lysates were cleared by centrifugation for 10 minutes at 12,000 g, and then the supernatant was diluted in Dilution Buffer (ExactaChIP, R&D Systems). ChIP input was incubated with either anti-IKZF1 (AF4984, R&D Systems) or Goat IgG Isotype Control Antibody (AB108C, R&D Systems) overnight at 4°C with

rotation. 5  $\mu$ g of biotinylated anti-goat IgG (BAF109, R&D Systems) was added for a further 2 hours, prior to the addition of Streptavidin-agarose beads (Sigma Aldrich) for 1 hour. Agarose beads were collected by centrifugation, and sequential washes performed with Wash Buffer 1 – Wash Buffer 4 (R&D Systems). After the final wash, Chelating Resin solution was added to the beads and the samples boiled for 10 minutes. Immunoprecipitated DNA or input material was incubated at 65°C to remove cross-links, and purified using the Qiagen PCR purification kit. ChIP-PCR was performed using primers flanking a binding site upstream of *FUT8* identified by ChIP-Seq analysis in the GM12878 cell line (Forward, 5' - ACAGGGAAGATGAGTGGGAG- 3', Reverse 5' – AGGACTTCTGGGACTTCGTC- 3') to confirm Ikaros-DNA complexes also occur in MATAT6 cells. PCR products were analysed on 2% (w/v) agarose gel by electrophoresis in Tris-borate EDTA buffer.

## Results

### Prioritising genes associated with IgG N-glycosylation

First, we investigated each candidate gene's functional similarity to members of enriched gene-sets. Data-driven Expression-Prioritized Integration for Complex Traits (DEPICT) (10) significantly prioritised genes in 14 loci at  $FDR \leq 0.05$  and another 3 at  $FDR \leq 0.2$  (Appendix Table 9). Five loci span glycosyltransferase genes and three of these were selected using DEPICT (*ST6GAL1* and *B4GALT1* at  $FDR \leq 0.05$  and *FUT8* at  $FDR \leq 0.2$ ). In the remaining loci prioritised genes (*IRF1*, *NXPE4*, *IKZF1*, *IKZF3*, *ORMDL3*, *GSDMB*, *GGA2*, *ARHGAP27*, *RUNX1*, *VPREB3* at  $FDR \leq 0.05$  and *RUNX3*, *SLC38A10* at  $FDR \leq 0.2$ ) have no known role in protein glycosylation but are predicted to be involved in pathways and tissues related to development and activation of B-cells, the cells responsible for synthesis of IgG. Full DEPICT results can be seen in Appendix Table 9.

We next checked if any of the associated SNPs (both significant and suggestive – 1,815 SNPs in total) result in a change in the amino acid (AA) sequence and, therefore, potentially have a more direct influence on the function of the resulting protein. Using the PolyPhen-2 and SIFT (82) tools (as implemented in VEP (11)) we found that genes from 7 loci contain non-synonymous mutations, with at least one probably damaging variant in genes from 2 loci and non-sense variants in one locus. SNPs coding for tolerated AA changes were observed in *NXPE1* (rs7944960:Leu>Ser), *NXPE4* (rs550897:Tyr>His), *SLC22A4* (rs1050152:Leu>Phe), *ZPBP2* (rs11557467:Ser>Ile) and *SYNGR1* (rs4821888:Thr>Ala). Probably damaging AA changes were observed in *GSDMB* (rs2305479:Gly>Arg), *SPPL2C* (rs12185233:His>Pro, rs12373142:Pro>Arg) and *MAPT* (rs17651549:Arg>Trp). The last three SNPs are in high LD, making it impossible to distinguish the most likely target gene in this locus. In addition, IgG N-glycosylation associated variants in *CRHR1* and *MAPT* IgG N-glycosylation



associated variants result in non-sense mutations (*CRHR1* rs16940665:stop>Arg, *MAPT* rs754512:Lys>stop) (Appendix Table 10).

The final step was to check if any of the glycosylation associated SNPs were previously associated with gene expression. Given that IgGs are predominantly synthesised in B-cells, often activated by a signal from other immune cells, we looked at expression QTLs (eQTLs) from 5 different immune cells (B-cells, two types of T-cells, neutrophils and macrophages) from the CEDAR dataset (N=350; Momozawa *et al* (13)) and peripheral blood from Westra *et al* (14) (N=5,311). To extend the analysis beyond a single shared SNP, we applied Summary-level Mendelian Randomization (SMR) with Heterogeneity in Dependent Instruments (HEIDI) (12).

In total, in 14 genome-wide significant loci we observed significant SMR ( $p_{SMR} \leq 0.05/2,622=1.9 \times 10^{-5}$ ) for expression with at least one glycan trait. In 9 of these loci we observed pleiotropy of IgG glycosylation with gene expression ( $p_{HEIDI} \geq 0.05$ ). In CD19 B-cells, the cell lineage primarily responsible for synthesis of IgG, pleiotropy was observed with expression of four genes (*B4GALT1*, *GSDMB*, *ORMDL3*, *MGAT3*) (Figure 1, [https://shiny.igmm.ed.ac.uk/igg\\_glycans\\_gwas/](https://shiny.igmm.ed.ac.uk/igg_glycans_gwas/)). Two of these genes, *MGAT3* and *B4GALT1*, are glycosyltransferases. The remaining two genes, *ORMDL3* and *GSDMB*, have no known direct link with glycosylation, but were in the past strongly linked to asthma, inflammatory bowel disease (IBD) and other immune diseases (83). In peripheral blood we observed pleiotropy with expression of 8 additional genes (glycosyltransferase *ST6GAL1* and *SLC22A4*, *COG7*, *CEP131*, *TEPSIN*, *SLC38A10*, *RFXANK*, *CHCHD10*). The lack of pleiotropy with expression of glycosyltransferases *FUT8* and *ST6GAL1* in B-cells can partly be explained by weak eQTLs for these genes (the lowest observed eQTL p-values for *ST6GAL1* in B-cells =  $3.5 \times 10^{-4}$  and  $3.62 \times 10^{-4}$  for *FUT8*, Appendix Table 11). Full

results of this analysis can be seen in the online resource available at [https://shiny.igmm.ed.ac.uk/igg\\_glycans\\_gwas/](https://shiny.igmm.ed.ac.uk/igg_glycans_gwas/).

### **Additional validation of the functional network regulating IgG N-glycosylation**

We hypothesised that the transcription factors in the functional network may be involved directly in regulation of the expression of glycosyltransferase genes in IgG secreting cells.

The regulatory potential of the associated variants in B-cells, and the impact upon transcription factor binding, was inferred by interrogation of ENCODE chromatin-immunoprecipitation sequencing (ChIP-seq) experiments performed in the lymphoblastoid cell line (LCL) GM12878, or by comparison to known binding site motifs. As shown in Supplementary Table 9, a striking number of the variants tested were predicted to have strong impact on binding weight scores obtained for RUNX1, RUNX3 and IRF1, providing further evidence to corroborate the links in the functional network in Figure 2a.

*FUT8* had the strongest glycome-wide association with the *ORMDL3-GSDMB-IKZF3-ZPBP2* and *IKZF1* loci. Unlike rs5750830, the lead SNP for the *MGAT3* loci, we found no evidence that the six variants contributing to variation in IGP42 glycan level in the region of *FUT8* (Supplementary Table 3) are eQTLs for *FUT8*, or that they alter binding sites for IKZF1 using RSAT for motif discovery in GM12878 Encode IKZF1 Chip-Seq data. We next identified IKZF1 binding sites on chromosome 14 near to *FUT8* in the GM12878 Encode ChIP-Seq data, and performed chromatin immunoprecipitation (ChIP) assays to investigate occupancy of these sites. In the GM12878 Encode ChIP-Seq data, 10 sites upstream of *FUT8* were occupied by IKZF1. In an IgG secreting LCL, IKZF1 bound most strongly to chr14: 65757755-65758024 (Figure 3a).

Interrogation of sequences surrounding SNPs in high LD with rs11847263 (top *FUT8* SNP): rs1054218, rs8006608, rs4073416, rs4902409 or rs4400971 predicted that variants on the same haplotype will affect IRF, RUNX1, RUNX3 and CTCF binding sites (Supplementary Table 9). Due to the low frequency of this haplotype, we were unable to identify a lymphoblastoid cell line (LCL) with appropriate genotype to assess the functional consequences of these putative alterations in transcription factor and CTCF binding. Publically available Hi-C profiling (45) performed to 1 kb resolution in the LCL GM12878 indicates that these SNPs lie in the same chromosomal topological associating domain (TAD) as the transcription start site (TSS) of *FUT8* (Supplementary Figure 3). CTCF plays a crucial role in maintaining the 3-dimensional structure of the genome, and disruption of CTCF binding by SNPs in LD with rs4400971 may modify the interactions formed between enhancer and promoter regions of *FUT8* to affect expression of the glycosyltransferase enzyme.

### Appendix Table 9. DEPICT gene prioritization.

SNP - SNP with the lowest p-value with any of the glycans from GCTA-joint analysis; SNP P-value - p-value of the SNP in GCTA-joint analysis; gene - HUGO gene symbol; Nominal p-value - the nominal gene prioritisation p-value; FDR - the estimated false discovery rate of the gene

| Locus                 | SNP        | # genes in locus | GWAS P-value | Gene            | Enrichment P-value | Closest to lead SNP | FDR   |
|-----------------------|------------|------------------|--------------|-----------------|--------------------|---------------------|-------|
| 1:25226001-25345011   | rs10903118 | 1                | 2.41e-12     | RUNX3           | 3.00e-02           | true                | <0.20 |
| 1:61362132-61374136   | rs17303508 | 1                | 3.82e-08     | NFIA            | 3.50e-01           | true                | >0.20 |
| 1:246854862-246963137 | rs3795464  | 2                | 1.06e-08     | SCCPDH          | 8.40e-01           | false               | >0.20 |
|                       |            |                  |              | ENSG00000227953 | 9.00e-01           | true                | >0.20 |
| 2:100636757-          | rs2309748  | 2                | 3.46e-09     | AFF3            | 1.90e-01           | false               | >0.20 |

|                        |            |       |           |                 |          |       |       |
|------------------------|------------|-------|-----------|-----------------|----------|-------|-------|
| 100805273              |            |       |           | ENSG00000230393 | 6.40e-01 | true  | >0.20 |
| 3:186712711-186738421  | rs7621161  | 1     | 2.82e-162 | ST6GAL1         | 1.24e-03 | true  | <0.05 |
| 5:95211647-95347786    | rs7700895  | 1     | 1.48e-14  | ELL2            | 9.00e-02 | true  | >0.20 |
| 5:131026218-131833599  | rs11748193 | 11    | 4.53e-10  | IRF1            | 7.89e-03 | false | <0.05 |
|                        |            |       |           | IL3             | 8.78e-03 | false | <0.05 |
|                        |            |       |           | CSF2            | 5.00e-02 | false | <0.20 |
|                        |            |       |           | FNIP1           | 9.00e-02 | false | >0.20 |
|                        |            |       |           | C5orf56         | 3.40e-01 | false | >0.20 |
|                        |            |       |           | SLC22A4         | 4.60e-01 | false | >0.20 |
|                        |            |       |           | P4HA2           | 6.20e-01 | false | >0.20 |
|                        |            |       |           | PDLIM4          | 8.80e-01 | false | >0.20 |
|                        |            |       |           | SLC22A5         | 9.50e-01 | false | >0.20 |
| ACSL6                  | 9.80e-01   | false | >0.20     |                 |          |       |       |
|                        |            |       |           | ENSG00000233006 | 1.00e+00 | true  | >0.20 |
| 6:139617590-139636003  | rs9385856  | 1     | 5.99e-19  | TXLNB           | 5.00e-01 | true  | >0.20 |
| 6:143150223-143203591  | rs7758383  | 1     | 1.11e-13  | HIVEP2          | 2.20e-01 | true  | >0.20 |
| 7:6520676-6537913      | rs6964421  | 2     | 6.17e-11  | KDELR2          | 2.60e-01 | false | >0.20 |
|                        |            |       |           | DAGLB           | 9.30e-01 | true  | >0.20 |
| 7:50325717-50361683    | rs6421315  | 1     | 1.22e-26  | IKZF1           | 2.10e-03 | true  | <0.05 |
| 7:150906453-150969535  | rs7812088  | 2     | 3.52e-22  | ABCF2           | 3.30e-01 | true  | >0.20 |
|                        |            |       |           | SMARCD3         | 9.60e-01 | false | >0.20 |
| 8:103538266-103550211  | rs10096810 | 1     | 1.12e-10  | ODF1            | 9.10e-01 | true  | >0.20 |
| 9:33041761-33186080    | rs10813951 | 1     | 1.77e-49  | B4GALT1         | 1.00e-02 | true  | <0.05 |
| 9:33205136-33375592    | rs12341905 | 4     | 3.56e-08  | BAG1            | 3.90e-01 | false | >0.20 |
|                        |            |       |           | NFX1            | 5.20e-01 | false | >0.20 |
|                        |            |       |           | SPINK4          | 8.30e-01 | true  | >0.20 |
|                        |            |       |           | CHMP5           | 8.70e-01 | false | >0.20 |
| 11:114323627-114450529 | rs481080   | 2     | 1.23e-16  | NXPE4           | 3.30e-03 | false | <0.05 |
|                        |            |       |           | NXPE1           | 3.90e-01 | true  | >0.20 |
| 14:65472891-66284991   | rs10148907 | 1     | 1.05e-55  | FUT8            | 2.00e-02 | true  | <0.20 |
| 14:105966019-106002352 | rs4074453  | 1     | 7.66e-29  | TMEM121         | 4.60e-01 | true  | >0.20 |
| 16:23397113-23613191   | rs250555   | 5     | 7.83e-10  | GGA2            | 9.09e-04 | false | <0.05 |
|                        |            |       |           | NDUFAB1         | 6.00e-02 | false | <0.20 |
|                        |            |       |           | UBFD1           | 1.00e-01 | false | >0.20 |
|                        |            |       |           | EARS2           | 1.90e-01 | false | >0.20 |
|                        |            |       |           | COG7            | 5.30e-01 | true  | >0.20 |
| 17:16820099-16875636   | rs4561508  | 2     | 6.14e-09  | TNFRSF13B       | 1.88e-04 | false | <0.05 |
|                        |            |       |           | TBC1D27         | 6.70e-03 | true  | <0.05 |

|                      |            |    |          |                 |          |       |        |
|----------------------|------------|----|----------|-----------------|----------|-------|--------|
| 17:37903731-38112190 | rs7216389  | 4  | 1.74e-15 | IKZF3           | 2.23e-03 | false | <0.05  |
|                      |            |    |          | ORMDL3          | 3.76e-04 | false | <0.05  |
|                      |            |    |          | GSDMB           | 8.90e-03 | true  | <0.05  |
|                      |            |    |          | ZPBP2           | 7.30e-01 | false | >0.20  |
| 17:43463492-44896083 | rs199456   | 13 | 9.14e-14 | ARHGAP27        | 3.46e-03 | false | <0.05  |
|                      |            |    |          | PLEKHM1         | 2.00e-02 | false | <0.20  |
|                      |            |    |          | KIAA1267        | 2.00e-02 | true  | <0.20  |
|                      |            |    |          | ENSG00000214401 | 5.70e-01 | false | >0.20  |
|                      |            |    |          | NSF             | 6.40e-01 | false | >0.20  |
|                      |            |    |          | STH             | 7.30e-01 | false | >0.20  |
|                      |            |    |          | ARL17A          | 7.30e-01 | false | >0.20  |
|                      |            |    |          | ENSG00000204650 | 8.20e-01 | false | >0.20  |
|                      |            |    |          | WNT3            | 8.30e-01 | true  | >0.20  |
|                      |            |    |          | CRHR1           | 8.50e-01 | false | >0.20  |
| 17:45518583-45874272 | rs11651000 | 5  | 2.91e-12 | TBX21           | 1.40e-01 | true  | >0.20  |
|                      |            |    |          | C17orf57        | 2.40e-01 | false | >0.20  |
|                      |            |    |          | NPEPPS          | 3.30e-01 | false | >0.20  |
|                      |            |    |          | KPNB1           | 3.40e-01 | false | >0.20  |
|                      |            |    |          | TBKBP1          | 4.70e-01 | false | >0.20  |
| 17:56398006-56410041 | rs2526378  | 2  | 4.68e-09 | MIR142          | 1.00e-02 | false | <0.05  |
|                      |            |    |          | BORCS8          | 3.30e-01 | true  | >0.20  |
| 17:79165171-79257880 | rs2725391  | 4  | 1.31e-15 | SLC38A10        | 3.00e-02 | false | <0.20  |
|                      |            |    |          | TEPSIN          | 2.90e-01 | false | >0.20  |
|                      |            |    |          | C17orf89        | 3.70e-01 | false | >0.20  |
|                      |            |    |          | CEP131          | 5.20e-01 | true  | >0.20  |
| 19:1614910-1658699   | rs4807942  | 1  | 1.58e-08 | TCF3            | 3.12e-03 | true  | <0.05  |
| 19:5822316-5845974   | rs874232   | 4  | 8.12e-13 | ENSG00000249707 | 7.00e-02 | false | <0.20  |
|                      |            |    |          | FUT3            | 4.50e-01 | false | >0.20  |
|                      |            |    |          | NRTN            | 6.60e-01 | false | >0.20  |
| 19:19260586-19296217 | rs7257072  | 1  | 1.98e-13 | FUT6            | 8.40e-01 | true  | >0.20  |
|                      |            |    |          | MEF2BNB         | 9.80e-01 | false | >0.20  |
| 20:17818141-17833534 | rs2745851  | 1  | 5.36e-13 | MGME1           | 6.80e-01 | true  | >0.20  |
| 20:52170177-52212273 | rs1555926  | 2  | 7.17e-09 | ZNF217          | 4.43e-03 | false | <0.05  |
|                      |            |    |          | ENSG00000197670 | 8.60e-01 | true  | >0.20  |
| 21:36546756-36665202 | rs7281587  | 1  | 1.21e-13 | RUNX1           | 7.07e-03 | false | <0.05  |
| 22:24093789-24182500 | rs17630758 | 6  | 7.60e-41 | VPREB3          | 4.11e-06 | false | <=0.01 |
|                      |            |    |          | DERL3           | 5.00e-02 | false | <0.20  |
|                      |            |    |          | CHCHD10         | 1.90e-01 | false | >0.20  |

|              |           |   |          |  |          |          |       |       |
|--------------|-----------|---|----------|--|----------|----------|-------|-------|
|              |           |   |          |  | MMP11    | 4.10e-01 | false | >0.20 |
|              |           |   |          |  | SMARCB1  | 4.40e-01 | true  | >0.20 |
|              |           |   |          |  | C22orf15 | 9.40e-01 | false | >0.20 |
| 22:39774448- |           |   |          |  | TAB1     | 6.70e-01 | false | >0.20 |
| 39860868     | rs5750830 | 3 | 3.43e-66 |  | SYNGR1   | 9.80e-01 | false | >0.20 |
|              |           |   |          |  | MGAT3    | 1.00e+00 | true  | >0.20 |

**Appendix Table 10. SNPs associated with IgG glycosylation with nonsynonymous amino acid change.**

| Locus                              | gene        | SNP       | LD  | p-value   | Amino Acid Change | Ensembl Transcript                                                                       | SIFT Descript | SIFT Score                   | PolyPhen Descript | PolyPhen Score                   |
|------------------------------------|-------------|-----------|-----|-----------|-------------------|------------------------------------------------------------------------------------------|---------------|------------------------------|-------------------|----------------------------------|
| 5:952116<br>47-<br>95347786        | ELL2        | rs3815768 |     | 1.537e-12 | Ala => Thr        | ENST0000051334<br>3<br>ENST0000023785<br>3                                               | tolerated     | 0.66<br>1.00                 | benign            | 0.040<br>0.001                   |
| 5:131026<br>218-<br>13183359<br>9  | SLC22<br>A4 | rs1050152 |     | 6.099e-09 | Leu => Phe        | ENST0000020065<br>2                                                                      | tolerated     | 0.14                         | benign            | 0.119                            |
| 6:292993<br>90-<br>33883424        | TCF19       | rs7750641 |     | 5.859e-10 | Pro => Ser        | ENST0000037625<br>7<br>ENST0000037625<br>5<br>ENST0000054221<br>8                        | tolerated     | 0.34<br>0.34<br>0.55         | benign            | 0.050<br>0.050<br>0.023          |
|                                    | TNXB        | rs1150752 |     | 1.981e-09 | Thr => Ala        | ENST0000061321<br>4<br>ENST0000047979<br>5                                               | tolerated     | 0.25,<br>0.28                | benign            | 0.002<br>0.011                   |
|                                    | HLA-<br>DRA | rs7192    |     | 1.267e-09 | Val => Leu        | ENST0000037498<br>2<br>ENST0000039538<br>8                                               | tolerated     | 0.21<br>0.26                 | benign            | 0.001<br>0.001                   |
| 11:11432<br>3627-<br>11445052<br>9 | NXPE1       | rs7944960 | 0.2 | 5.817e-11 | Leu => Ser        | ENST0000053492<br>1<br>ENST0000042426<br>9<br>ENST0000053631<br>2<br>ENST0000053987<br>8 | tolerated     | 0.18<br>0.47<br>0.54<br>0.61 | benign            | 0.013<br>0.013<br>0.036<br>0.013 |
|                                    | NXPE4       | rs550897  |     | 1.057e-16 | Tyr => His        | ENST0000042426<br>1<br>ENST0000037547<br>8                                               | tolerated     | 1.00<br>1.00                 | benign            | 0.000<br>0.000                   |

|          |           |           |        |                |                |                |           |          |          |       |
|----------|-----------|-----------|--------|----------------|----------------|----------------|-----------|----------|----------|-------|
| 17:37903 | ZBPB2     | rs1155746 | 0.8    | 1.510e         | Ser =>         | ENST0000037794 | tolerated | 0.08     | benign   | 0.004 |
| 731-     |           | 7         | 2      | -14            | Ile            | 0              |           | 0.08     |          | 0.173 |
| 38112190 |           |           |        |                |                | ENST0000034893 |           | 0.12     |          | 0.142 |
|          |           |           |        |                |                | 1              |           |          |          |       |
|          |           |           |        |                |                | ENST0000058381 |           |          |          |       |
|          |           |           |        |                |                | 1              |           |          |          |       |
| <hr/>    |           |           |        |                |                |                |           |          |          |       |
| GSDM     | rs2305480 | 0.8       | 2.329e | Pro =>         | ENST0000052054 | tolerated      | 0.08      | benign   | 0.356    |       |
| B        |           | 2         | -14    | Ser            | 2              |                | 0.08      |          | 0.242    |       |
|          |           |           |        |                | ENST0000036031 |                | 0.08      |          | 0.242    |       |
|          |           |           |        |                | 7              |                | 0.08      |          | 0.242    |       |
|          |           |           |        |                | ENST0000039417 |                | 0.08      |          | 0.242    |       |
|          |           |           |        |                | 9              |                | 0.11      |          | 0.110    |       |
|          |           |           |        |                | ENST0000041851 |                |           |          |          |       |
|          |           |           |        |                | 9              |                |           |          |          |       |
|          |           |           |        |                | ENST0000030948 |                |           |          |          |       |
|          |           |           |        |                | 1              |                |           |          |          |       |
|          |           |           |        |                | ENST0000039417 |                |           |          |          |       |
|          |           |           |        |                | 5              |                |           |          |          |       |
| <hr/>    |           |           |        |                |                |                |           |          |          |       |
|          | rs2305479 | 7.287e    | Gly => | ENST0000039417 | deleterio      | 0.00           | Probably  | 0.996    |          |       |
|          |           | -14       | Arg    | 9              | us             | 0.00           | damaging  | 0.995    |          |       |
|          |           |           |        | ENST0000036031 |                | 0.00           |           | 0.996    |          |       |
|          |           |           |        | 7              |                | 0.00           |           | 0.993    |          |       |
|          |           |           |        | ENST0000030948 |                | 0.00           |           | 0.997    |          |       |
|          |           |           |        | 1              |                | 0.00           |           | 0.995    |          |       |
|          |           |           |        | ENST0000039417 |                |                |           |          |          |       |
|          |           |           |        | 5              |                |                |           |          |          |       |
|          |           |           |        | ENST0000052054 |                |                |           |          |          |       |
|          |           |           |        | 2              |                |                |           |          |          |       |
|          |           |           |        | ENST0000041851 |                |                |           |          |          |       |
|          |           |           |        | 9              |                |                |           |          |          |       |
| <hr/>    |           |           |        |                |                |                |           |          |          |       |
| 17:43463 | CRHR1     | rs1694066 | 0.9    | 2.937e         | stop =>        | ENST0000061915 | NA,       | NA       | NA       | NA    |
| 492-     |           | 5         | 1      | -13            | Arg            | 4              | Deleterio |          |          |       |
| 44896083 |           | rs1694067 | 0.8    | 8.507e         | Ala =>         | ENST0000058388 | ous low   | 0.00     | unknown  | 0.000 |
|          |           | 4         | 0      | -12            | Val            | 8              | confiden  |          |          |       |
|          |           |           |        |                |                |                | ce        |          |          |       |
| <hr/>    |           |           |        |                |                |                |           |          |          |       |
| SPPL2    | rs1218523 | 1.0       | 1.397e | Arg =>         | ENST0000032919 | deleterio      | 0.01      | Probably | 1.000    |       |
| C        |           | 3         | 0      | -11            | Pro            | 6              | us        | 1.00     | damaging | 0.001 |
|          | rs1218526 | 1.0       | 6.428e | Ile =>         | ENST0000032919 | tolerated      | 0.01      | benign   | 0.019    |       |
|          | 8         | 0         | -13    | Val            | 6              | Deleterio      | 0.06      | benign   | 0.004    |       |
|          | rs1237314 | 1.0       | 1.558e | Pro =>         | ENST0000032919 | ous low        |           | benign   |          |       |
|          | 2         | 0         | -11    | Arg            | 6              | confiden       |           |          |          |       |
|          | rs1237314 | 1.558e    | Pro => | ENST0000032919 | ce             |                |           |          |          |       |
|          | 2         | -11       | Leu    | 6              | Tolerate       |                |           |          |          |       |
|          |           |           |        |                | d low          |                |           |          |          |       |
|          |           |           |        |                | confiden       |                |           |          |          |       |
|          |           |           |        |                | ce             |                |           |          |          |       |

|          |           |           |        |        |                |           |      |          |       |
|----------|-----------|-----------|--------|--------|----------------|-----------|------|----------|-------|
| MAPT     | rs754512  | 1.0       | 1.588e | Lys => | ENST0000057651 | NA        | NA   | NA       | NA    |
|          | rs1765154 | 0         | -11    | stop   | 8              | deleterio | 0.00 | Probably | 0.993 |
|          | 9         | 1.0       | 1.610e | Arg => | ENST0000041561 | us        | 0.00 | damaging | 0.522 |
|          |           | 0         | -11    | Trp    | 3              |           | 0.00 |          | 0.522 |
|          |           |           |        |        | ENST0000026241 |           | 0.00 |          | 0.993 |
|          |           |           |        |        | 0              |           | 0.77 | benign   | 0.000 |
|          | rs1044533 |           |        |        | ENST0000057198 | tolerated | 0.77 |          | 0.000 |
|          | 7         | 4.185e    |        | Ser => | 7              |           | 1.00 |          | 0.000 |
|          |           | -13       |        | Pro    | ENST0000034429 |           | 1.00 |          | 0.000 |
|          |           |           |        |        | 0              |           |      |          |       |
|          |           |           |        |        | ENST0000026241 |           |      |          |       |
|          |           |           |        |        | 0              |           |      |          |       |
|          |           |           |        |        | ENST0000057198 |           |      |          |       |
|          |           |           |        |        | 7              |           |      |          |       |
|          |           |           |        |        | ENST0000034429 |           |      |          |       |
|          |           |           |        |        | 0              |           |      |          |       |
|          |           |           |        |        | ENST0000041561 |           |      |          |       |
|          |           |           |        |        | 3              |           |      |          |       |
| 22:39774 | SYNG      | rs4821888 | 2.171e | Thr => | ENST0000041533 | Tolerate  | 0.30 | unknown  | 0.000 |
| 448-     | R1        |           | -25    | Ala    | 2              | d low     |      |          |       |
| 39860868 |           |           |        |        |                | confiden  |      |          |       |
|          |           |           |        |        |                | ce        |      |          |       |

LD - linkage disequilibrium between the given and the SNP in the next row, as estimated with Broad Institute's SNAP tool. p-value - the lowest p-value for the given SNP in the discovery meta-analysis. In bold - replicated loci.



**Appendix Table 11. Strongest eQTL for each probe in each cell type in the CEDAR dataset.**

| SNP        | chromosome | Probe_Id     | gene    | tissue | P        |
|------------|------------|--------------|---------|--------|----------|
| rs8016322  | 14         | ILMN_1741422 | FUT8    | CD14   | 4.78E-06 |
| rs61085292 | 14         | ILMN_1741422 | FUT8    | CD19   | 3.62E-04 |
| rs1256519  | 14         | ILMN_1741422 | FUT8    | CD4    | 7.02E-07 |
| rs1256520  | 14         | ILMN_1741422 | FUT8    | CD8    | 3.25E-06 |
| rs6780016  | 3          | ILMN_2384496 | ST6GAL1 | CD4    | 1.25E-03 |
| rs13093508 | 3          | ILMN_2384496 | ST6GAL1 | CD19   | 5.86E-04 |
| rs4686837  | 3          | ILMN_2384496 | ST6GAL1 | PLA    | 2.08E-08 |
| rs55873928 | 3          | ILMN_2384496 | ST6GAL1 | CD8    | 4.66E-03 |
| rs35133002 | 3          | ILMN_2384496 | ST6GAL1 | CD14   | 1.87E-05 |
| rs56291008 | 3          | ILMN_1756501 | ST6GAL1 | CD15   | 2.16E-04 |
| rs13082825 | 3          | ILMN_1756501 | ST6GAL1 | CD14   | 2.02E-03 |
| rs4686837  | 3          | ILMN_1756501 | ST6GAL1 | PLA    | 2.77E-25 |
| rs4011973  | 3          | ILMN_1756501 | ST6GAL1 | CD19   | 3.50E-04 |
| rs28674898 | 3          | ILMN_1756501 | ST6GAL1 | CD4    | 5.79E-06 |
| rs58294975 | 3          | ILMN_1756501 | ST6GAL1 | CD8    | 2.52E-05 |

SNP - variant with the strongest association with a given probe in a given cell type;  
gene - target gene of the given probe; P - association p-value of a given SNP and  
expression of the given probe.

## Supplementary Figures

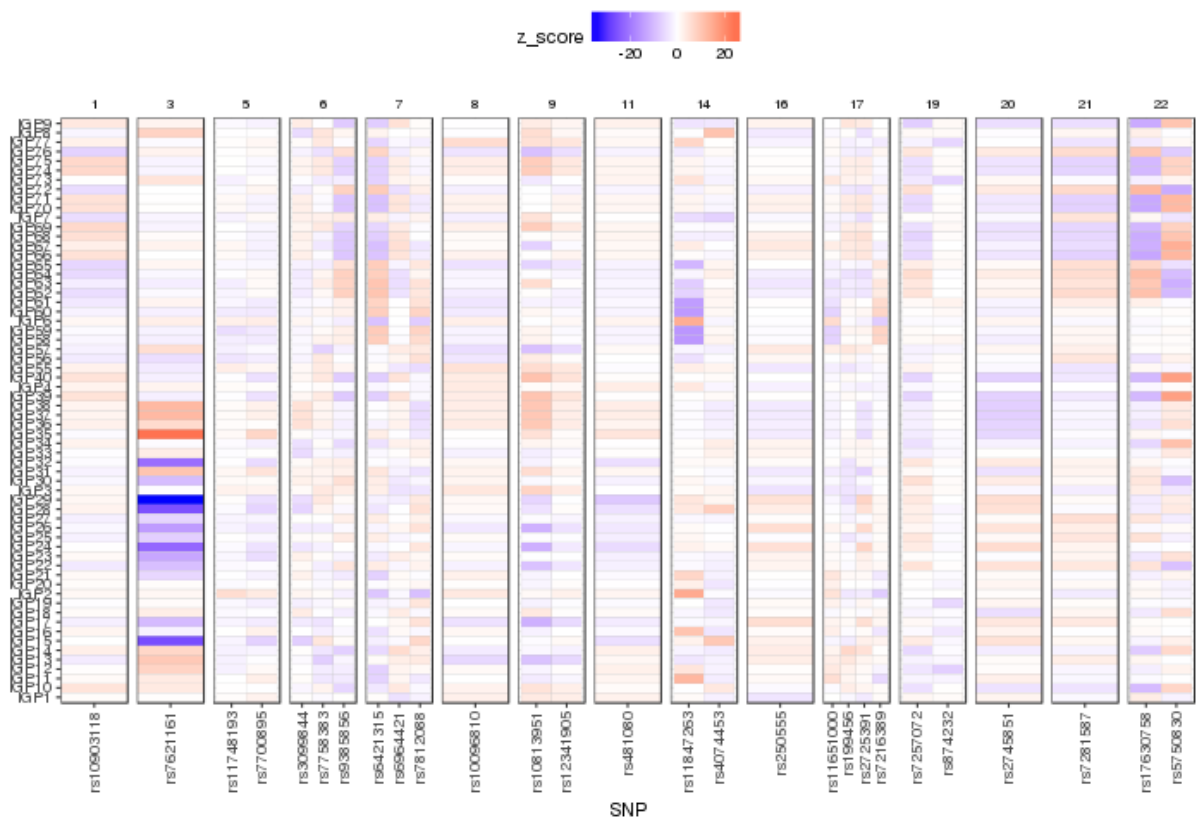

**Fig. S1. Glycome-wide effect estimates of genome-wide significant loci.** Each row represents z-score of effect estimate of a given glycan in all loci. Each column represents z-score of effect estimate of a given SNP in all glycans.

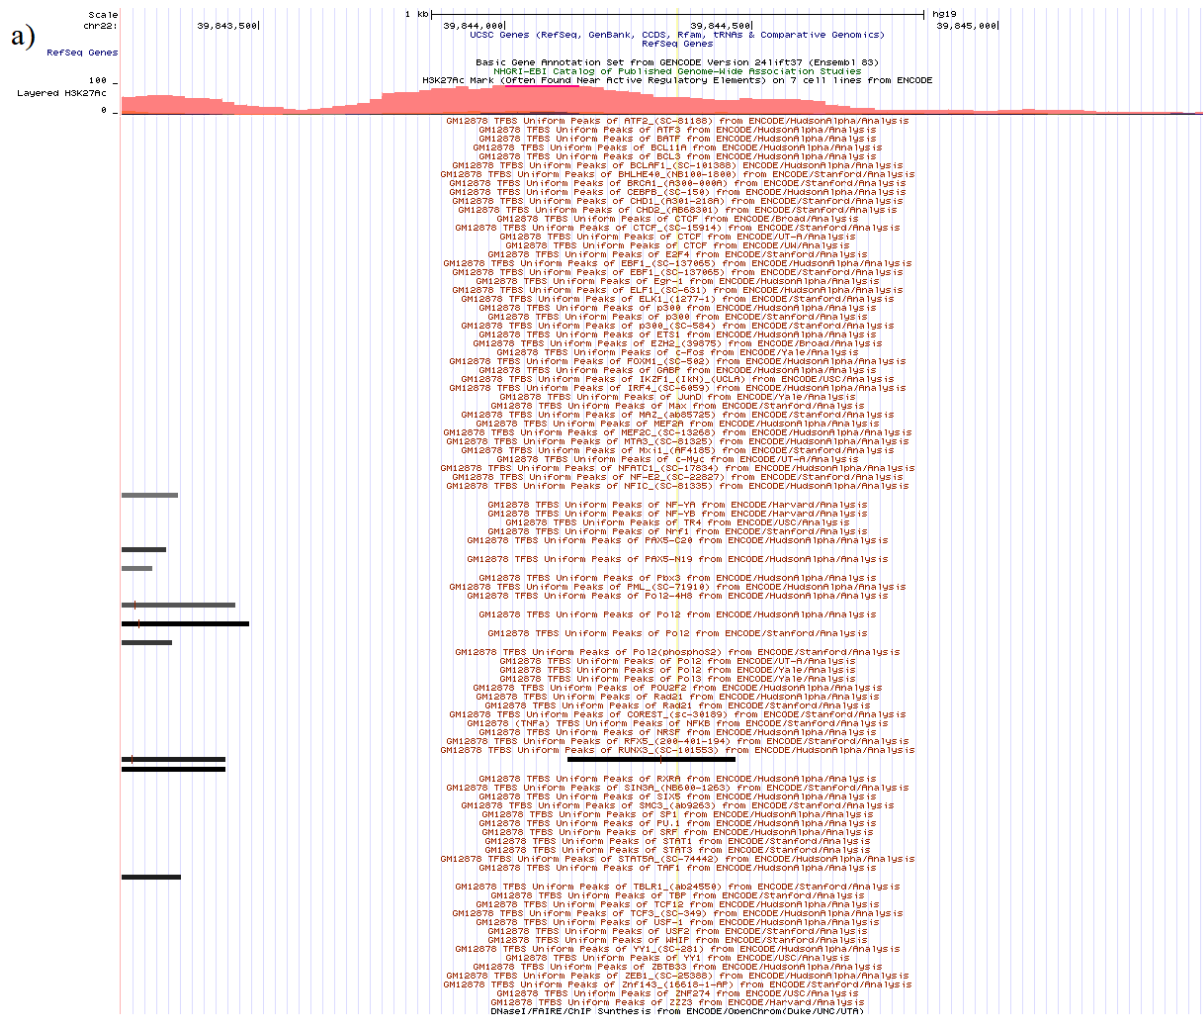

**Fig. S2A. RUNX3 binding in the proximity of MGAT3 rs8137426, SNP strongly associated with IgG N-glycosylation is the region bound by RUNX3, in the proximity of MGAT3. Thick black lines represent transcription factor binding sites in the lymphoblastoid cell line GM12878 as observed in the ENCODE chip-data. Vertical yellow line represents position of the rs8137426. Layered H3K27AC panel shows that the area is likely to be transcriptionally active and marks a potential active enhancer. Data obtained from the UCSC genome browser in June 2017.**

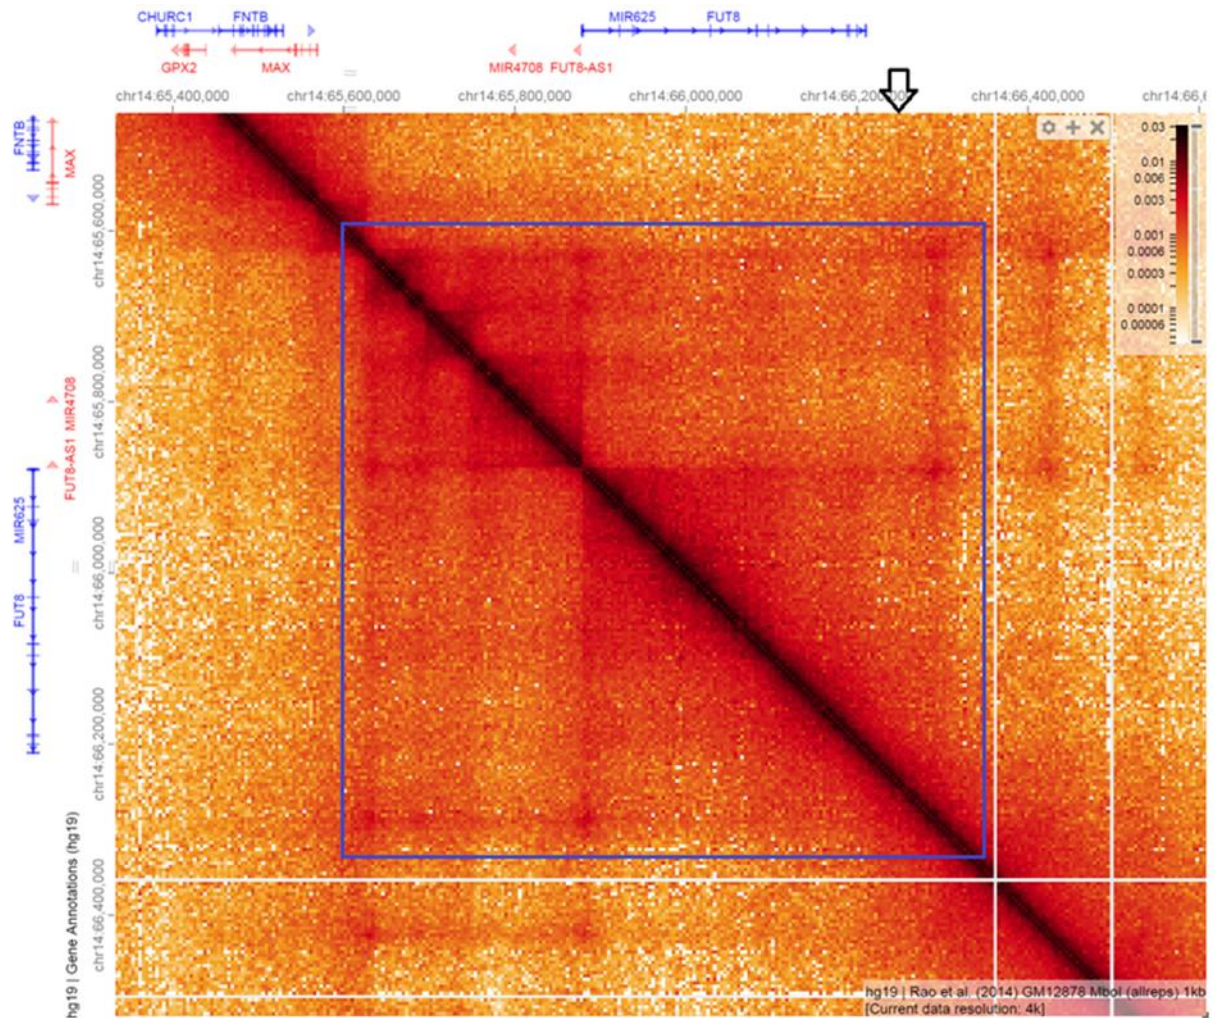

**Fig. S2B.** Top SNPs in *FUT8* locus lie in the same chromosomal topological associating domain as the transcription start site of *FUT8*. Hi-C profiling performed to 1 kb resolution in the LCL GM12878. Top *FUT8* SNPs are indicated by an arrow. Topological associating domain (TAD) is outlined in blue. Disruption of CTCF binding by SNPs in LD with rs4400971 may modify the interactions formed between enhancer and promoter regions of *FUT8*. Figure obtained from <http://higlass.io/app/><sup>134</sup>.
